# Supplementary material
Source: MDPI journal article supplement (https://www.mdpi.com/2071-1050/12/11/4358)
Supplement: s1 [file s1]

## Supplementary material

**Table S.1** Raw material content of construction materials (based on [1], [2], [3] and Bills of Quantities)

| Construction material       | Raw material ratios (in % based on the mass of the construction material) |      |             |                                  |
|-----------------------------|---------------------------------------------------------------------------|------|-------------|----------------------------------|
|                             | Stones                                                                    | Sand | Clay / Marl | Other (e.g. fly ash, water, ...) |
| Concrete, 4x6, grade 150    | 62                                                                        | 32   | 2           | 5                                |
| Concrete, 1x2, grade 250    | 64                                                                        | 27   | 4           | 5                                |
| Cement                      | 70                                                                        |      | 30          |                                  |
| Clay Bricks (vertical kiln) |                                                                           |      | 100         |                                  |
| Clay Bricks (tunnel kiln)   |                                                                           |      | 80          | max. 20                          |
| Clay Bricks (Hoffman kiln)  |                                                                           |      | 30          | max. 70                          |
| Fine asphalt concrete       | 60                                                                        | 35   |             | 5                                |
| Rough asphalt concrete      | 75                                                                        | 20   |             | 5                                |

1. Department of Construction Hoa Binh. *Resolution 76/2013/NQ-HDND: Master Plan for Exploitation and Use of Minerals for Construction Materials of Hoa Binh Province: Stones and Sand for Construction Materials, CLAY for Bricks in Hoa Binh Province, Period 2014–2019, with a Vision to 2024*; Department of Construction: Hoa Binh, Vietnam, 2013.
2. Ministry of Construction. *Circular No. 1784/BXD-VP: Descriptions and Guidance Manual of the Application of Construction Materials*; Ministry of Construction: Hanoi, Vietnam, 2007.
3. Ministry of Construction. *TCVN 1450:2009: Hollow Clay Bricks*; Ministry of Construction: Hanoi, Vietnam, 2009.
